# Supplementary material for: Socioeconomic gradients in early childhood health: evidence from Bangladesh and Nepal
Source: PubMed Central journal article supplement (PMC4867530; doi:10.1186/s12939-016-0364-2), 2016-05-16
Supplement: 12939_2016_364_MOESM1_ESM.pdf [file 12939_2016_364_MOESM1_ESM.pdf]

Socioeconomic Gradients in Early Childhood Health: Evidence  
from Bangladesh and Nepal  
(Supplementary Figures and Tables)

Satis Devkota\*

Bibhudutta Panda<sup>†</sup>

April 9, 2016

---

\*University of Minnesota-Morris, Division of Social Science, 600 East 4th Street, Morris, MN 56267. Phone: 320-589-6198, Email: sdevkota@morris.umn.edu

<sup>†</sup>Corresponding Author: University of Minnesota-Morris, Division of Social Science, 600 East 4th Street, Morris, MN 56267. Phone: 320-589-6205, Email: bpanda@morris.umn.edu

**Figure S1: Flow Chart of Sample Selection**

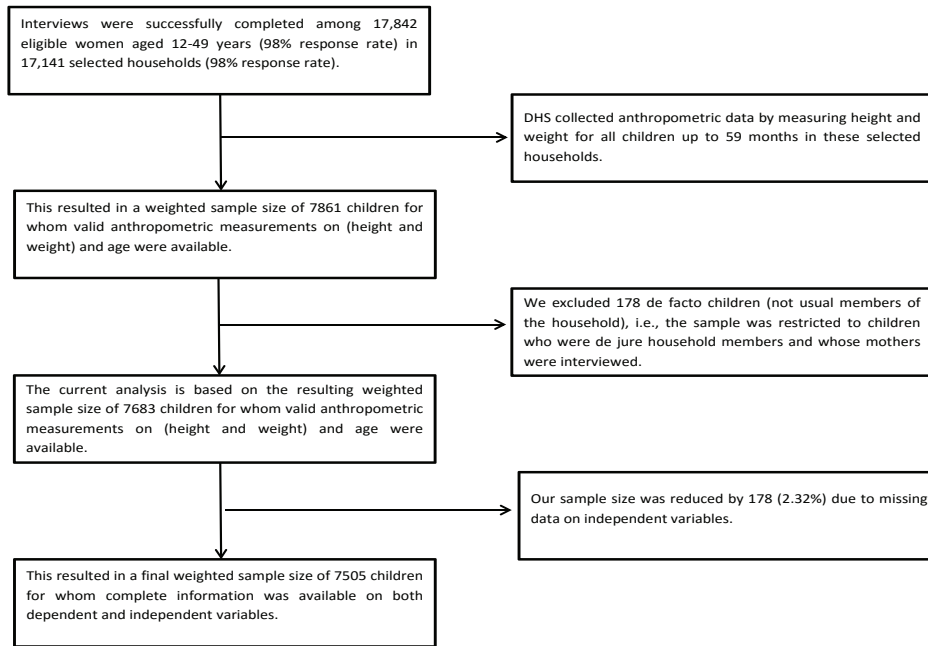

(a) Bangladesh

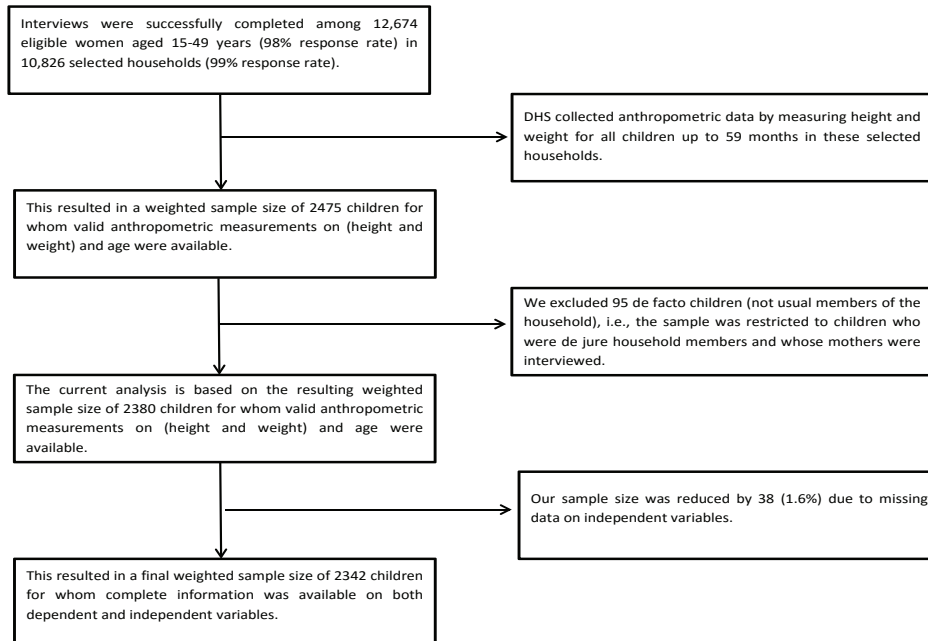

(b) Nepal

Table S1: Sample Characteristics by Wealth and Maternal Education Categories (Bangladesh)

|                              | Wealth Quintiles   |                    |                    |                    |                    | Mother's Education |                    |                    |
|------------------------------|--------------------|--------------------|--------------------|--------------------|--------------------|--------------------|--------------------|--------------------|
|                              | Poorest            | Poorer             | Middle             | Richer             | Richest            | No Educ.           | Primary            | Secondary          |
|                              | Mean (SD)          |                    |                    |                    |                    | Mean (SD)          |                    |                    |
| HAZ                          | -2.111<br>(1.356)  | -1.828<br>(1.285)  | -1.678<br>(1.297)  | -1.511<br>(1.364)  | -1.074<br>(1.522)  | -1.998<br>(1.377)  | -1.864<br>(1.374)  | -1.422<br>(1.387)  |
| WAZ                          | -1.989<br>(1.045)  | -1.777<br>(1.017)  | -1.616<br>(1.087)  | -1.432<br>(1.109)  | -1.044<br>(1.324)  | -1.920<br>(1.052)  | -1.802<br>(1.086)  | -1.348<br>(1.180)  |
| Child Specific Variables     |                    |                    |                    |                    |                    |                    |                    |                    |
| Child's Age Group            |                    |                    |                    |                    |                    |                    |                    |                    |
| Age 0-11M                    | 0.186<br>(0.375)   | 0.191<br>(0.384)   | 0.199<br>(0.395)   | 0.215<br>(0.416)   | 0.197<br>(0.425)   | 0.165<br>(0.360)   | 0.187<br>(0.388)   | 0.216<br>(0.418)   |
| Age 12-35M                   | 0.371<br>(0.467)   | 0.378<br>(0.474)   | 0.375<br>(0.479)   | 0.361<br>(0.487)   | 0.387<br>(0.520)   | 0.334<br>(0.457)   | 0.377<br>(0.483)   | 0.389<br>(0.494)   |
| Age 36-59M                   | 0.443<br>(0.479)   | 0.431<br>(0.484)   | 0.426<br>(0.489)   | 0.424<br>(0.501)   | 0.416<br>(0.526)   | 0.501<br>(0.485)   | 0.437<br>(0.494)   | 0.394<br>(0.496)   |
| Male                         | 0.496<br>(0.482)   | 0.511<br>(0.488)   | 0.523<br>(0.494)   | 0.513<br>(0.507)   | 0.512<br>(0.534)   | 0.497<br>(0.485)   | 0.524<br>(0.498)   | 0.508<br>(0.507)   |
| Birth Size                   | 0.190<br>(0.379)   | 0.186<br>(0.380)   | 0.174<br>(0.375)   | 0.152<br>(0.364)   | 0.141<br>(0.371)   | 0.183<br>(0.375)   | 0.175<br>(0.379)   | 0.162<br>(0.373)   |
| Birth Order                  | 2.958<br>(1.733)   | 2.517<br>(1.664)   | 2.276<br>(1.494)   | 2.166<br>(1.365)   | 1.877<br>(1.080)   | 3.651<br>(1.966)   | 2.529<br>(1.480)   | 1.800<br>(0.980)   |
| Mother Specific Variables    |                    |                    |                    |                    |                    |                    |                    |                    |
| Mother's Age                 | 26.104<br>(5.964)  | 25.235<br>(6.004)  | 25.090<br>(5.899)  | 25.166<br>(5.555)  | 25.992<br>(5.749)  | 29.080<br>(6.635)  | 25.209<br>(5.532)  | 24.284<br>(5.100)  |
| Maternal Education           |                    |                    |                    |                    |                    |                    |                    |                    |
| No Education                 | 0.436<br>(0.478)   | 0.238<br>(0.416)   | 0.128<br>(0.330)   | 0.090<br>(0.290)   | 0.045<br>(0.222)   | -                  | -                  | -                  |
| Primary                      | 0.395<br>(0.472)   | 0.389<br>(0.476)   | 0.320<br>(0.462)   | 0.257<br>(0.443)   | 0.125<br>(0.353)   | -                  | -                  | -                  |
| Secondary                    | 0.169<br>(0.362)   | 0.373<br>(0.472)   | 0.552<br>(0.492)   | 0.654<br>(0.482)   | 0.830<br>(0.401)   | -                  | -                  | -                  |
| Mother's Height              | 149.877<br>(5.540) | 150.881<br>(5.298) | 150.749<br>(5.286) | 151.172<br>(5.336) | 152.143<br>(5.539) | 150.046<br>(5.274) | 150.325<br>(5.495) | 151.594<br>(5.430) |
| Mother's BMI                 | 19.261<br>(2.494)  | 19.915<br>(2.589)  | 20.441<br>(3.050)  | 21.588<br>(3.562)  | 23.183<br>(4.181)  | 19.917<br>(2.887)  | 20.103<br>(3.039)  | 21.498<br>(3.704)  |
| Father Specific Variables    |                    |                    |                    |                    |                    |                    |                    |                    |
| Father's Age                 | 34.818<br>(8.277)  | 33.799<br>(8.178)  | 33.518<br>(7.765)  | 34.062<br>(7.408)  | 34.845<br>(7.390)  | 38.490<br>(8.892)  | 33.707<br>(7.828)  | 32.793<br>(6.770)  |
| Father's Education           |                    |                    |                    |                    |                    |                    |                    |                    |
| No Education                 | 0.586<br>(0.475)   | 0.376<br>(0.473)   | 0.233<br>(0.418)   | 0.137<br>(0.348)   | 0.058<br>(0.249)   | 0.666<br>(0.458)   | 0.367<br>(0.481)   | 0.102<br>(0.307)   |
| Primary                      | 0.312<br>(0.447)   | 0.362<br>(0.469)   | 0.318<br>(0.461)   | 0.278<br>(0.454)   | 0.165<br>(0.396)   | 0.238<br>(0.413)   | 0.407<br>(0.490)   | 0.242<br>(0.434)   |
| Secondary                    | 0.102<br>(0.292)   | 0.261<br>(0.429)   | 0.449<br>(0.492)   | 0.585<br>(0.499)   | 0.777<br>(0.444)   | 0.096<br>(0.286)   | 0.226<br>(0.417)   | 0.656<br>(0.482)   |
| Household Specific Variables |                    |                    |                    |                    |                    |                    |                    |                    |
| Household Wealth Status      |                    |                    |                    |                    |                    |                    |                    |                    |
| Richest                      | -                  | -                  | -                  | -                  | -                  | 0.040<br>(0.189)   | 0.072<br>(0.257)   | 0.295<br>(0.463)   |
| Richer                       | -                  | -                  | -                  | -                  | -                  | 0.084<br>(0.270)   | 0.159<br>(0.364)   | 0.251<br>(0.439)   |
| Middle                       | -                  | -                  | -                  | -                  | -                  | 0.124<br>(0.320)   | 0.205<br>(0.403)   | 0.219<br>(0.419)   |
| Poorer                       | -                  | -                  | -                  | -                  | -                  | 0.241<br>(0.415)   | 0.259<br>(0.437)   | 0.154<br>(0.366)   |
| Poorest                      | -                  | -                  | -                  | -                  | -                  | 0.511<br>(0.485)   | 0.305<br>(0.459)   | 0.081<br>(0.277)   |
| Log (Household Size)         | 1.639<br>(0.307)   | 1.691<br>(0.349)   | 1.772<br>(0.410)   | 1.802<br>(0.436)   | 1.804<br>(0.475)   | 1.759<br>(0.345)   | 1.725<br>(0.387)   | 1.733<br>(0.423)   |
| Rural                        | 0.940<br>(0.229)   | 0.926<br>(0.256)   | 0.869<br>(0.334)   | 0.701<br>(0.464)   | 0.380<br>(0.518)   | 0.864<br>(0.333)   | 0.809<br>(0.392)   | 0.727<br>(0.452)   |
| Religion                     | 0.917<br>(0.267)   | 0.924<br>(0.258)   | 0.905<br>(0.290)   | 0.907<br>(0.295)   | 0.913<br>(0.301)   | 0.925<br>(0.255)   | 0.933<br>(0.250)   | 0.897<br>(0.308)   |

Table S2: Sample Characteristics by Wealth and Maternal Education Categories (Nepal)

|                              | Wealth Quintiles   |                    |                    |                    |                    | Mother's Education |                    |                    |
|------------------------------|--------------------|--------------------|--------------------|--------------------|--------------------|--------------------|--------------------|--------------------|
|                              | Poorest            | Poorer             | Middle             | Richer             | Richest            | No Educ.           | Primary            | Secondary          |
|                              | Mean (SD)          |                    |                    |                    |                    | Mean (SD)          |                    |                    |
| HAZ                          | -2.108<br>(1.490)  | -1.882<br>(1.349)  | -1.531<br>(1.272)  | -1.346<br>(1.234)  | -1.101<br>(1.277)  | -1.941<br>(1.369)  | -1.664<br>(1.293)  | -1.248<br>(1.367)  |
| WAZ                          | -1.691<br>(1.165)  | -1.665<br>(1.043)  | -1.441<br>(0.952)  | -1.163<br>(0.981)  | -0.855<br>(1.137)  | -1.714<br>(1.049)  | -1.399<br>(1.023)  | -1.017<br>(1.076)  |
| Child Specific Variables     |                    |                    |                    |                    |                    |                    |                    |                    |
| Child's Age Group            |                    |                    |                    |                    |                    |                    |                    |                    |
| Age 0-11M                    | 0.171<br>(0.412)   | 0.187<br>(0.393)   | 0.229<br>(0.379)   | 0.190<br>(0.370)   | 0.207<br>(0.420)   | 0.163<br>(0.365)   | 0.194<br>(0.394)   | 0.245<br>(0.438)   |
| Age 12-35M                   | 0.410<br>(0.538)   | 0.399<br>(0.493)   | 0.392<br>(0.441)   | 0.455<br>(0.470)   | 0.353<br>(0.495)   | 0.401<br>(0.484)   | 0.420<br>(0.492)   | 0.397<br>(0.499)   |
| Age 36-59M                   | 0.418<br>(0.539)   | 0.414<br>(0.496)   | 0.379<br>(0.438)   | 0.355<br>(0.452)   | 0.440<br>(0.514)   | 0.436<br>(0.490)   | 0.386<br>(0.485)   | 0.359<br>(0.489)   |
| Male                         | 0.496<br>(0.547)   | 0.567<br>(0.499)   | 0.444<br>(0.448)   | 0.499<br>(0.472)   | 0.546<br>(0.516)   | 0.492<br>(0.494)   | 0.521<br>(0.498)   | 0.515<br>(0.510)   |
| Birth Size                   | 0.231<br>(0.461)   | 0.195<br>(0.399)   | 0.161<br>(0.332)   | 0.168<br>(0.353)   | 0.096<br>(0.305)   | 0.206<br>(0.400)   | 0.161<br>(0.366)   | 0.147<br>(0.362)   |
| Birth Order                  | 3.404<br>(2.450)   | 2.789<br>(1.993)   | 2.270<br>(1.382)   | 2.051<br>(1.245)   | 1.783<br>(1.044)   | 3.313<br>(2.088)   | 2.314<br>(1.509)   | 1.631<br>(0.917)   |
| Mother Specific Variables    |                    |                    |                    |                    |                    |                    |                    |                    |
| Mother's Age                 |                    |                    |                    |                    |                    |                    |                    |                    |
|                              | 28.823<br>(7.703)  | 26.742<br>(6.307)  | 25.568<br>(4.935)  | 25.141<br>(4.490)  | 27.034<br>(4.579)  | 28.525<br>(6.431)  | 25.574<br>(5.592)  | 24.966<br>(4.672)  |
| Maternal Education           |                    |                    |                    |                    |                    |                    |                    |                    |
| No Education                 | 0.712<br>(0.495)   | 0.559<br>(0.500)   | 0.506<br>(0.451)   | 0.278<br>(0.423)   | 0.076<br>(0.275)   | -                  | -                  | -                  |
| Primary                      | 0.188<br>(0.427)   | 0.256<br>(0.440)   | 0.218<br>(0.373)   | 0.211<br>(0.385)   | 0.082<br>(0.284)   | -                  | -                  | -                  |
| Secondary                    | 0.101<br>(0.329)   | 0.185<br>(0.392)   | 0.276<br>(0.403)   | 0.512<br>(0.472)   | 0.842<br>(0.379)   | -                  | -                  | -                  |
| Mother's Height              | 150.815<br>(5.954) | 150.449<br>(5.407) | 150.908<br>(4.470) | 151.586<br>(4.972) | 152.440<br>(5.564) | 150.483<br>(5.425) | 150.937<br>(4.892) | 152.134<br>(5.236) |
| Mother's BMI                 | 20.473<br>(2.595)  | 20.364<br>(2.460)  | 20.623<br>(2.536)  | 21.281<br>(2.973)  | 22.985<br>(3.608)  | 20.231<br>(2.465)  | 21.214<br>(2.961)  | 21.883<br>(3.261)  |
| Father Specific Variables    |                    |                    |                    |                    |                    |                    |                    |                    |
| Father's Age                 |                    |                    |                    |                    |                    |                    |                    |                    |
|                              | 33.143<br>(10.207) | 30.471<br>(7.680)  | 29.351<br>(5.296)  | 30.020<br>(5.383)  | 31.984<br>(5.339)  | 32.949<br>(8.062)  | 29.063<br>(6.640)  | 29.451<br>(5.553)  |
| Father's Education           |                    |                    |                    |                    |                    |                    |                    |                    |
| No Education                 | 0.365<br>(0.526)   | 0.280<br>(0.453)   | 0.230<br>(0.380)   | 0.092<br>(0.272)   | 0.006<br>(0.079)   | 0.410<br>(0.486)   | 0.080<br>(0.271)   | 0.032<br>(0.179)   |
| Primary                      | 0.340<br>(0.518)   | 0.310<br>(0.466)   | 0.264<br>(0.398)   | 0.140<br>(0.328)   | 0.083<br>(0.286)   | 0.317<br>(0.459)   | 0.330<br>(0.469)   | 0.095<br>(0.299)   |
| Secondary                    | 0.296<br>(0.499)   | 0.410<br>(0.496)   | 0.506<br>(0.451)   | 0.768<br>(0.398)   | 0.911<br>(0.295)   | 0.273<br>(0.440)   | 0.590<br>(0.490)   | 0.873<br>(0.339)   |
| Household Specific Variables |                    |                    |                    |                    |                    |                    |                    |                    |
| Household Wealth Status      |                    |                    |                    |                    |                    |                    |                    |                    |
| Richest                      | -                  | -                  | -                  | -                  | -                  | 0.023<br>(0.147)   | 0.058<br>(0.232)   | 0.352<br>(0.487)   |
| Richer                       | -                  | -                  | -                  | -                  | -                  | 0.102<br>(0.299)   | 0.183<br>(0.386)   | 0.265<br>(0.450)   |
| Middle                       | -                  | -                  | -                  | -                  | -                  | 0.253<br>(0.429)   | 0.258<br>(0.436)   | 0.194<br>(0.403)   |
| Poorer                       | -                  | -                  | -                  | -                  | -                  | 0.240<br>(0.422)   | 0.261<br>(0.438)   | 0.112<br>(0.322)   |
| Poorest                      | -                  | -                  | -                  | -                  | -                  | 0.383<br>(0.480)   | 0.240<br>(0.425)   | 0.076<br>(0.271)   |
| Log (Household Size)         | 1.769<br>(0.395)   | 1.715<br>(0.418)   | 1.741<br>(0.366)   | 1.754<br>(0.446)   | 1.637<br>(0.427)   | 1.806<br>(0.374)   | 1.671<br>(0.447)   | 1.660<br>(0.426)   |
| Rural                        | 0.980<br>(0.153)   | 0.980<br>(0.140)   | 0.961<br>(0.174)   | 0.876<br>(0.311)   | 0.647<br>(0.495)   | 0.954<br>(0.206)   | 0.926<br>(0.260)   | 0.842<br>(0.372)   |
| Religion                     | 0.864<br>(0.374)   | 0.804<br>(0.400)   | 0.803<br>(0.359)   | 0.875<br>(0.312)   | 0.855<br>(0.365)   | 0.822<br>(0.378)   | 0.831<br>(0.373)   | 0.866<br>(0.347)   |

Table S3: Age-Specific Maternal Education Gradients in Early Childhood Health (By Educational Categories)

| Panel A                                     |                      |                      |                                      |                      |
|---------------------------------------------|----------------------|----------------------|--------------------------------------|----------------------|
| Bangladesh (Dependent Variable: HAZ Scores) |                      |                      |                                      |                      |
| (Without Father's Education)                |                      |                      | (With Father's Education)            |                      |
|                                             | (1)                  | (2)                  | (3)                                  | (4)                  |
|                                             | No Education         | Primary Education    | No Education                         | Primary Education    |
| Age 0-11 M                                  | -0.072<br>(0.121)    | 0.031<br>(0.100)     | -0.035<br>(0.121)                    | 0.073<br>(0.100)     |
| Age 12-35 M                                 | -0.162*<br>(0.091)   | -0.132*<br>(0.070)   | -0.117<br>(0.090)                    | -0.089<br>(0.069)    |
| Age 36-59 M                                 | -0.132*<br>(0.069)   | -0.121**<br>(0.060)  | -0.087<br>(0.074)                    | -0.081<br>(0.062)    |
| N: 7508, R-Sq: 0.207; Mean VIF: 2.83        |                      |                      | N: 7505, R-Sq: 0.209; Mean VIF: 2.83 |                      |
| Panel B                                     |                      |                      |                                      |                      |
| Bangladesh (Dependent Variable: WAZ Scores) |                      |                      |                                      |                      |
| (Without Father's Education)                |                      |                      | (With Father's Education)            |                      |
|                                             | (1)                  | (2)                  | (3)                                  | (4)                  |
|                                             | No Education         | Primary Education    | No Education                         | Primary Education    |
| Age 0-11 M                                  | -0.288***<br>(0.099) | -0.130*<br>(0.073)   | -0.276***<br>(0.100)                 | -0.110<br>(0.073)    |
| Age 12-35 M                                 | -0.261***<br>(0.075) | -0.275***<br>(0.057) | -0.245***<br>(0.077)                 | -0.253***<br>(0.057) |
| Age 36-59 M                                 | -0.073<br>(0.060)    | -0.086*<br>(0.050)   | -0.058<br>(0.063)                    | -0.068<br>(0.052)    |
| N: 7508, R-Sq: 0.203; Mean VIF: 2.21        |                      |                      | N: 7504, R-Sq: 0.204; Mean VIF: 2.22 |                      |
| Panel C                                     |                      |                      |                                      |                      |
| Nepal (Dependent Variable: HAZ scores)      |                      |                      |                                      |                      |
| (Without Father's Education)                |                      |                      | (With Father's Education)            |                      |
|                                             | (1)                  | (2)                  | (3)                                  | (4)                  |
|                                             | No Education         | Primary Education    | No Education                         | Primary Education    |
| Age 0-11 M                                  | -0.174<br>(0.175)    | -0.015<br>(0.210)    | -0.151<br>(0.182)                    | -0.017<br>(0.212)    |
| Age 12-35 M                                 | -0.272**<br>(0.135)  | -0.236<br>(0.155)    | -0.240*<br>(0.135)                   | -0.237<br>(0.156)    |
| Age 36-59 M                                 | -0.142<br>(0.118)    | -0.000<br>(0.133)    | -0.110<br>(0.125)                    | 0.002<br>(0.136)     |
| N: 2352, R-Sq: 0.224; Mean VIF: 2.06        |                      |                      | N: 2342, R-Sq: 0.221; Mean VIF: 2.11 |                      |
| Panel D                                     |                      |                      |                                      |                      |
| Nepal (Dependent Variable: WAZ Scores)      |                      |                      |                                      |                      |
| (Without Father's Education)                |                      |                      | (With Father's Education)            |                      |
|                                             | (1)                  | (2)                  | (3)                                  | (4)                  |
|                                             | No Education         | Primary Education    | No Education                         | Primary Education    |
| Age 0-11 M                                  | -0.326**<br>(0.148)  | -0.131<br>(0.176)    | -0.320**<br>(0.149)                  | -0.133<br>(0.176)    |
| Age 12-35 M                                 | -0.312***<br>(0.112) | -0.265**<br>(0.130)  | -0.302***<br>(0.113)                 | -0.264**<br>(0.129)  |
| Age 36-59 M                                 | -0.278***<br>(0.104) | -0.076<br>(0.111)    | -0.261**<br>(0.108)                  | -0.076<br>(0.110)    |
| N: 2349, R-Sq: 0.189; Mean VIF: 2.07        |                      |                      | N: 2339, R-Sq: 0.187; Mean VIF: 2.12 |                      |

Note: The numbers in the parenthesis refer to the linearized standard errors that account for survey design and sample weight. \*\*\* indicates  $p < 0.01$ , \*\* indicates  $p < 0.05$  and \* indicates  $p < 0.1$ . The table reports regression coefficients of the interaction terms of dummies for each maternal educational category with child age group dummies where secondary education is the reference category. In each panel, we present results from two regression models. Columns (1) and (2) present results from a single regression model that does not control for father's education, and columns (3) and (4) present the results from the same model with father's education as an additional control variable. Each regression model control for the full set of control variables as in Table (4) of the main paper.
